# Supplementary material for: Effective NY-ESO-1–specific MHC II–restricted T cell receptors from antigen-negative hosts enhance tumor regression
Source: JCI journal article supplement (doi:10.1172/jci120391), 2018-12-09
Supplement: sd1 [file 1]

## Supplementary methods

### *Western blot*

$5 \times 10^6$ - $1 \times 10^7$  cells were used for protein extraction with cell lysis buffer (Mammalian Cell Lysis Kit, Sigma). Sodium dodecyl sulfate polyacrylamide gel electrophoresis (SDS-PAGE) was performed with 50 ug protein per sample, which was heated before at 70°C for 10 min in lithium dodecyl sulfate (LDS) sample buffer and sample reducing agent. Samples were run in a 10% polyacrylamide gel (bis-tris) in 2-morpholinoethanesulfonic acid (MES) SDS running buffer. Proteins were blotted onto a methanol-activated polyvinylidene difluoride (PVDF) membrane in transfer buffer (all buffer and components from Novex, Life Technologies). After blocking of the membrane, it was incubated with anti-NY-ESO-1 antibody 1:750 (E978, Sigma) at 4°C overnight. Then the membrane was incubated with goat anti-mouse IgG conjugated to horse radish peroxidase (HRP; Santa Cruz Biotechnology) 1:5000 and chemiluminescence was detected by Lumi-Imager F1 (Roche) after application of Western blotting Luminol Reagent (Santa Cruz). For loading control, actin was analyzed after incubation of the membrane with anti- $\beta$ -actin-HRP (AC-15, Sigma) 1:30000.

**Figure S1**

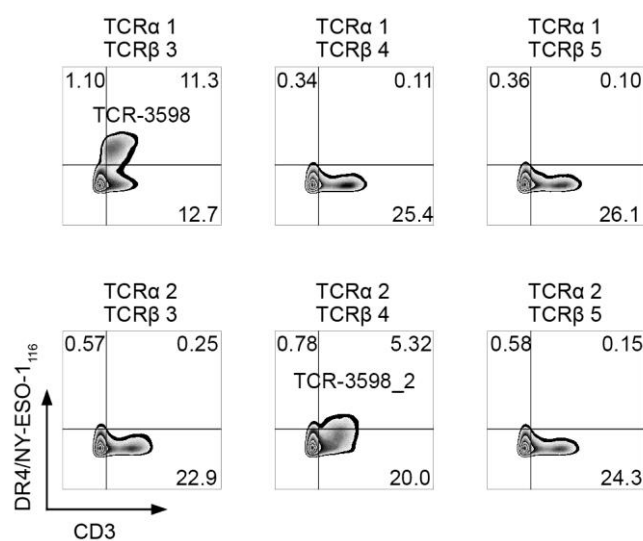

**Figure S1 Combinatorial expression of TCRα and β chains isolated from NY-ESO-1-reactive CD4 T cells from ABabDR4 mouse 3598 revealed two DR4/NY-ESO-1<sub>116</sub> tetramer binding TCRs.** Two TCRα and three TCRβ chains isolated from NY-ESO-1-reactive CD4 T cells (Figure 1B) were expressed in different combinations in TCR-deficient Jurkat76/CD4 cells and stained for CD3 and with DR4/NY-ESO-1<sub>116</sub> tetramer.

**Figure S2**

**A**

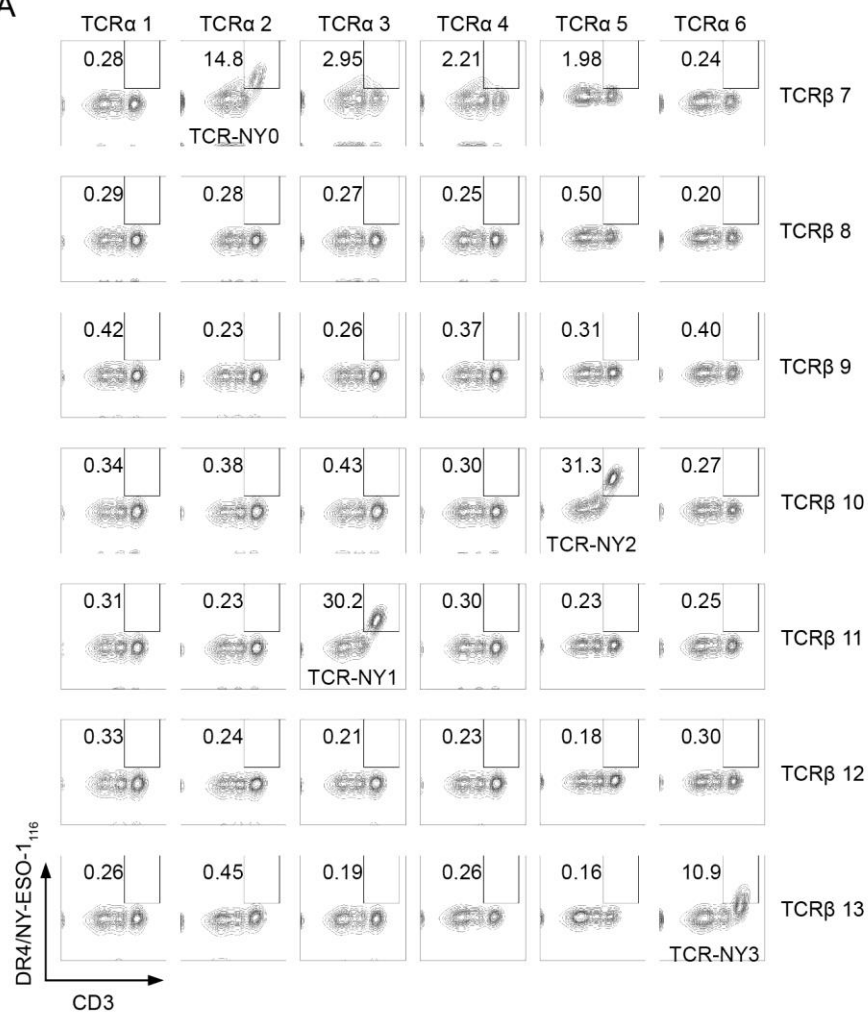

**B**

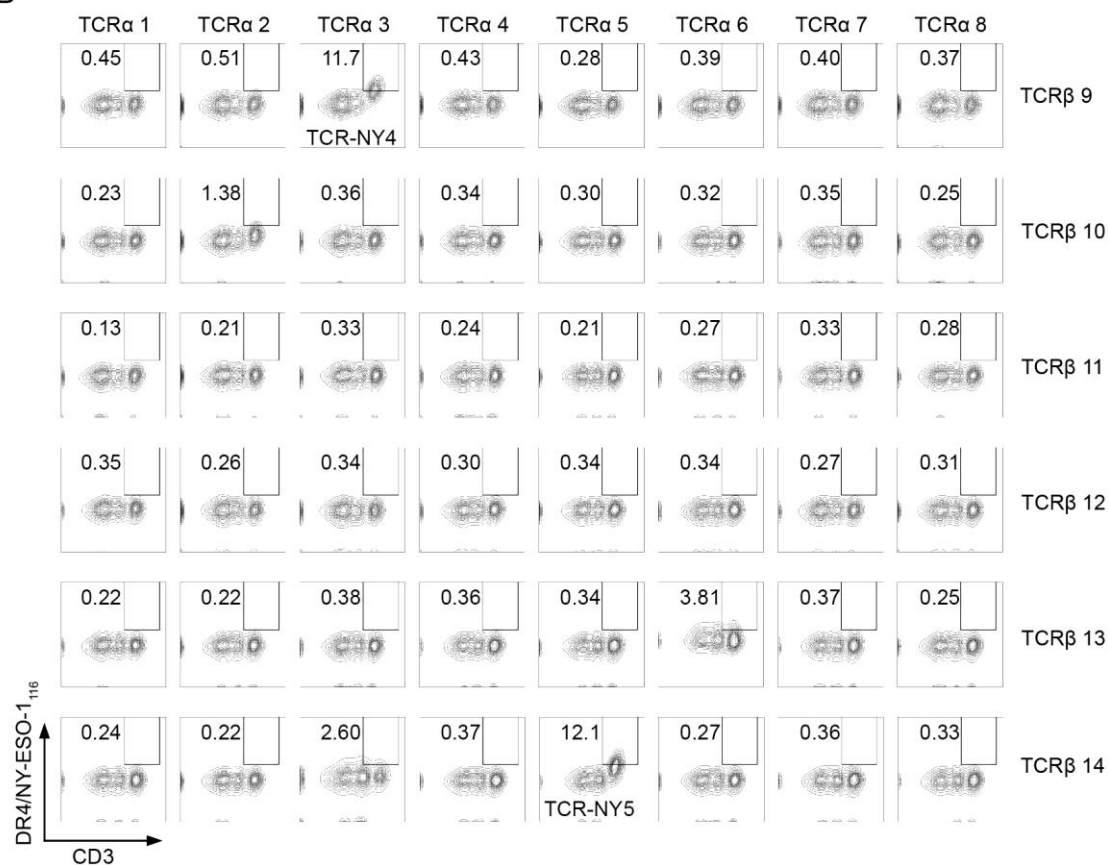

**Figure S2 Combinatorial expression of TCR $\alpha$  and  $\beta$  chains isolated from human PBL cultures revealed DR4/NY-ESO-1<sub>116</sub> tetramer binding TCRs.** TCR $\alpha$  and  $\beta$  chains isolated from two PBL in vitro cultures (A and B) were expressed in different combinations in TCR-deficient 58/CD4 cells and stained for CD3 and with DR4/NY-ESO-1<sub>116</sub> tetramer. TCR chains were considered if they occurred at least twice in 31 or 32 clones sequenced. TCR NY0 was not considered in further experiments, because initial tetramer staining technically failed.

**Figure S3**

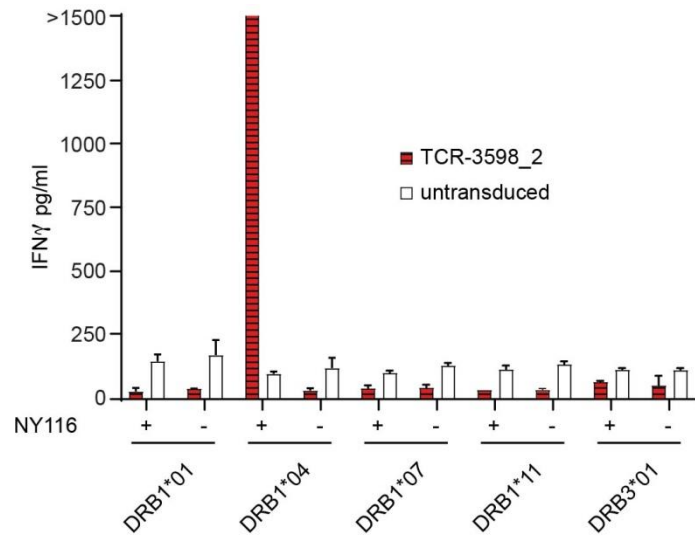

**Figure S3 TCR-3598\_2 is exclusively restricted to HLA-DR4.** TCR-transduced CD4 T cells were co-cultured with K562 cells expressing different HLA-DR molecules. NY-ESO-1<sub>116</sub> peptide (NY116) was added where indicated. After overnight incubation IFN $\gamma$  was measured in the supernatant. Mean values of intra-assay duplicates with standard deviation are shown. The results are representative of two independent experiments.

**Figure S4**

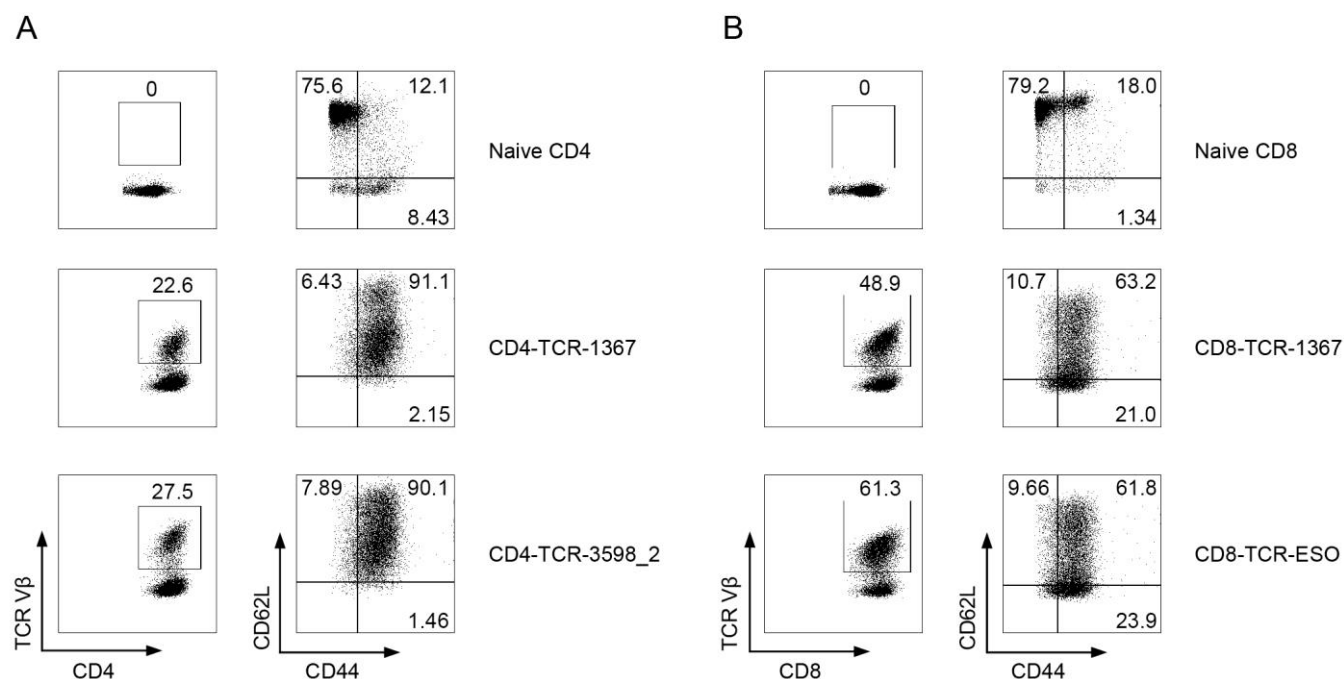

**Figure S4 Phenotype of T cells used for adoptive transfer. (A, B)** CD4 (A) and CD8 T cells (B) used for adoptive transfer were stained for CD4 or CD8, respectively, as well as for Vβ of the transduced TCR (TRBV2 for TCR-3598\_2, TRBV12 for TCR-ESO, TRBV28 for TCR-1367), and CD62L and CD44. Splenocytes from a naive B6 mouse were taken as control. Displayed cells in the second columns were gated on the stained Vβ or total CD4 or CD8 T cells for naïve T cells. The results are representative of two experiments.

**Figure S5**

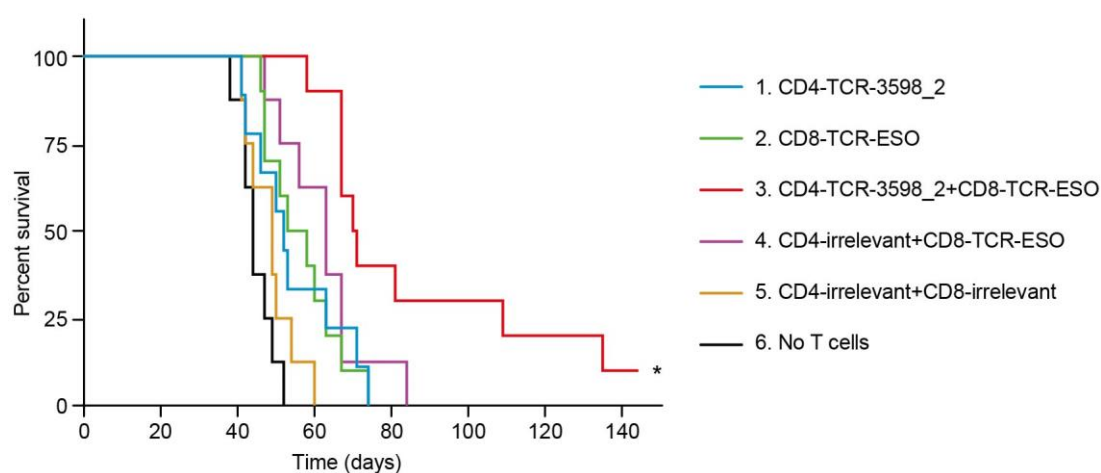

**Figure S5 Combined treatment with CD4 and CD8 T cells achieved longest survival.** Tumor-bearing mice were treated with TCR-3598\_2-transduced CD4 T cells and/or TCR-ESO-transduced CD8 T cells at day 30, when the tumors were palpable. TCR-1367-transduced CD4 and/or CD8 T cells were injected as controls (CD4-/CD8-irrelevant) where indicated. Displayed is percent survival of the indicated treatment groups with an endpoint of 500 mm<sup>3</sup> tumor volume. Survival was compared by Log-rank (Mantel-Cox) test. \**P*<0.05.

**Figure S6**

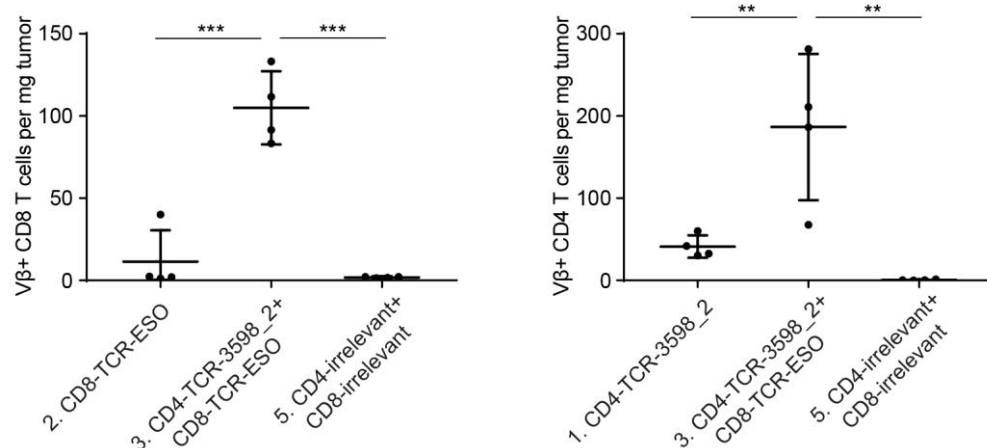

**Figure S6 More T cells were found in tumors of mice that were treated with CD4 and CD8 T cells in combination.** Tumor infiltrating lymphocytes were analyzed in tumor lysates prepared on day 5 following adoptive T cell therapy from indicated treatment groups. Group numbers refer to Figure 7. Cells were stained for CD3, CD4, CD8 and Vβ of the transduced TCRs. Each dot represents data derived from one individual mouse. One-way ANOVA followed by Bonferroni post-hoc test was performed for statistical analysis. \*\* $P < 0.01$ , \*\*\* $P < 0.005$ .



**Figure S7**

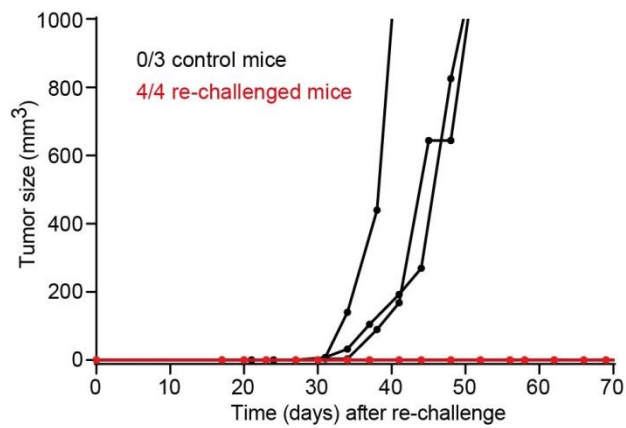

**Figure S7 Mice previously treated with CD4 and CD8 T cells in combination rejected tumor cells upon re-challenge.** Mice that were treated with TCR-3598\_2-transduced CD4 T cells and TCR-ESO-transduced CD8 T cells (group 3 in Figure 7) were injected with tumor cells in the opposite flank on day 37 (3 mice) or day 190 (1 mouse) after adoptive T cell therapy. Control mice were not treated previously.

**Figure S8**

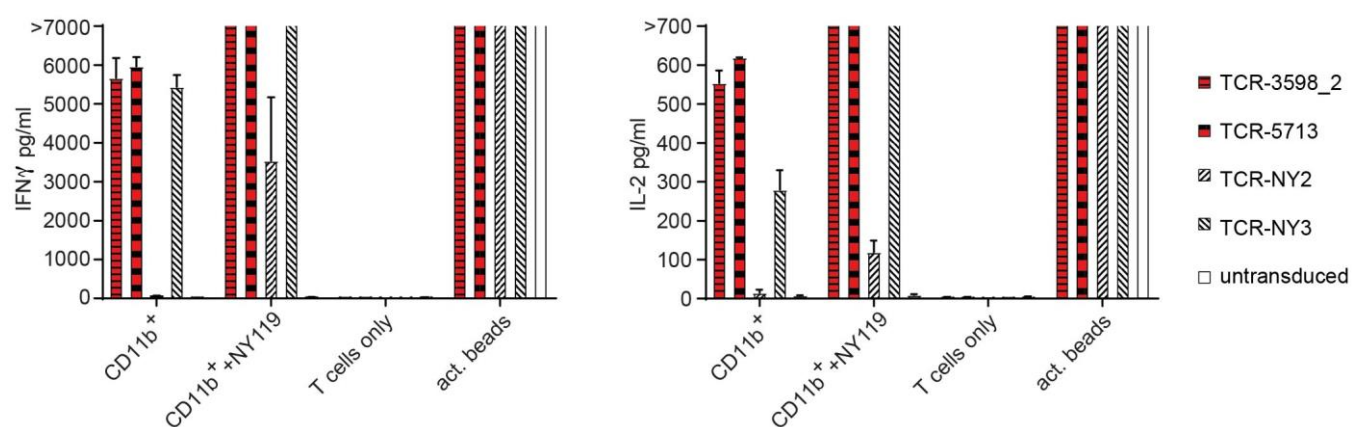

**Figure S8 Tumoral macrophages were recognized by TCR-transduced CD4 T cells.** CD11b<sup>+</sup> cells were isolated from tumor material and co-cultured with TCR-transduced CD4 T cells. As positive controls, CD11b<sup>+</sup> cells were loaded with NY-ESO-1<sub>119</sub> (NY119) or anti-CD3/CD28 activator beads were added to the T cells. Mean values of intra-assay duplicates with standard deviation are shown. The results are representative of three independent experiments.

# Table S1

HLA allotypes of the LCL panel and the blood donation used for TCR isolation.

| B-LCL       | A*       |        | B*       |      | C*     |      | DRB1*  |      | DRB3*  | DRB4*    | DRB5* | DQA1*  |        | DQB1*  |        | DPA1*  |        | DPB1*  |        |
|-------------|----------|--------|----------|------|--------|------|--------|------|--------|----------|-------|--------|--------|--------|--------|--------|--------|--------|--------|
| AMAI        | 6802     |        | 5301     |      | 0401   |      | 1503   |      |        |          | 0101  | 010201 |        | 0602   |        | 0301   |        | 0402   |        |
| AMALA       | 021701   |        | 15010101 |      | 0303   |      | 1402   |      | 0101   |          |       | 0501   |        | 0301   |        | 010301 |        | 0402   | 9401   |
| BSM         | 020101   |        | 15010101 |      | 030401 |      | 040101 |      |        | 01030101 |       | 03     |        | 030201 |        | 01     |        | 020102 |        |
| DJS         | 0201     | 0301   | 3501     | 3702 | 0401   | 0602 | 0101   | 1601 |        |          |       | 0101   | 0102   | 0501   | 0502   |        |        | 0401   | 0402   |
| DUCAF       | 3002     |        | 1801     |      | 0501   |      | 0301   |      | 0202   |          |       | 050101 |        | 0201   |        | 0103   |        | 0202   |        |
| HOR         | 330301   |        | 440301   |      | 1403   |      | 130201 |      | 030101 |          |       | 0102   |        | 0604   |        |        |        | 0401   |        |
| KAS011      | 010101   |        | 3701     |      | 0602   |      | 160101 |      |        |          | 0202  | 010202 | 010201 | 050201 |        | 020101 | 010301 | 1401   | 040101 |
| KAS116      | 24020101 |        | 5101     |      | 1203   |      | 0101   |      |        |          |       | 010101 |        | 050101 |        | 0201   |        | 1301   |        |
| KE          | 0201     | 2902   | 4403     | 4405 | 0202   | 1601 |        |      |        |          |       |        |        |        |        |        |        |        |        |
| MT14B       | 3101     |        | 4001     |      | 0304   |      | 0404   |      |        | 0101     |       | 03     |        | 0302   |        |        |        | 0402   |        |
| RML         | 0204     |        | 510101   |      | 1502   |      | 160201 |      |        |          | 0202  | 0501   |        | 0301   |        | 0103   |        | 0402   |        |
| SA          | 2E+07    |        | 070201   |      | 0702   |      | 0101   |      |        |          |       | 0101   |        | 050101 |        |        |        | 0402   |        |
| SPO         | 0201     |        | 4402     |      | 0501   |      | 1101   |      | 0202   |          |       | 010202 |        | 0502   |        | 01     |        | 020102 |        |
| TISI        | 24020101 |        | 3508     |      | 0401   |      | 1103   |      | 0202   |          |       | 0505   |        | 0301   |        | 0103   |        | 0402   |        |
| WIN         | 0101     |        | 570101   |      | 0602   |      | 0701   |      |        | 0101     |       | 0201   |        | 0202   | 030302 | 0103   | 020102 | 0401   | 1301   |
| Blood donor | 020101   | 310101 | 440201   |      | 050101 |      | 040101 |      |        | 0103     |       | 0303   |        | 030101 |        | 0103   |        | 040101 |        |

## Table S2

Peptide sequences containing the TCR-3598\_2 recognition motif X-X-X-X-L-K-E-F-X-X-X-X-X-X.

| Protein                                                        | Peptide <sup>A</sup> | IC50 (nM) |
|----------------------------------------------------------------|----------------------|-----------|
| Neuroserpin                                                    | EFSFLKEFSNMVTAK      | 11,40     |
| Folliculin-interacting protein 2                               | CQRFLKEFTLLIEQI      | 20,00     |
| Cytosol aminopeptidase                                         | AAAFLEFVTHPKWA       | 20,50     |
| Gamma-parvin                                                   | FFLHLKEFYLTNPSP      | 33,50     |
| DNA mismatch repair protein Msh3                               | IIKYLKEFNLEKMLS      | 39,50     |
| Protein Lines homolog                                          | RPLVLKEFDTAFSFD      | 68,90     |
| Ankyrin and armadillo repeat-containing protein                | NPAFLKEFQMQQTLV      | 73,70     |
| Piwi-like protein 3                                            | RHHTLKEFINTLQDN      | 93,90     |
| Protein LAP2                                                   | QLSGLKEFWMDANRL      | 95,80     |
| Apolipoprotein L1                                              | RNWFLKEFPRLKSEL      | 101,10    |
| Formin-like protein 2                                          | HNTLLKEFILNNEGK      | 105,40    |
| Apolipoprotein L2                                              | RQWFLKEFPRLKREL      | 107,60    |
| Formin-like protein 1                                          | DCMVLKEFLRANSPT      | 109,40    |
| Transcriptional-regulating factor 1                            | CSICLKEFKNLPALN      | 120,20    |
| Separin                                                        | LLPALKEFLSNPPAG      | 134,80    |
| Netrin-G2                                                      | SAKGLKEFFTLTDLR      | 139,90    |
| Discoidin domain-containing receptor 2                         | EPDDLKEFLQIDLHT      | 149,80    |
| Apolipoprotein L4                                              | REWFLKEFPQIRWKI      | 151,30    |
| Protein Jumonji                                                | LYLSLKEFKNSQKRQ      | 153,50    |
| Apolipoprotein L3                                              | REWFLKEFPQVKRKI      | 154,10    |
| Tripartite motif-containing protein 59                         | IFYLLKEFVWKIVSH      | 161,00    |
| Cell cycle checkpoint control protein RAD9A                    | ITFCLKEFRGLLSFA      | 165,10    |
| Putative E3 ubiquitin-protein ligase UNKL                      | HYRYLKEFRTEQCPL      | 180,20    |
| NACHT, LRR and PYD domains-containing protein 1                | KKEELKEFQLLANK       | 181,80    |
| Alpha-hemoglobin-stabilizing protein                           | ISAGLKEFSVLLNQQ      | 194,30    |
| Peroxisome biogenesis factor 1                                 | TKDGLKEFSLIVHS       | 202,00    |
| Probable small intestine urate exporter                        | WNETLKEFKAMSGIL      | 202,60    |
| <b>X-ray radiation resistance-associated protein 1</b>         | AKRLLKEFQARYRQL      | 205,90    |
| Protein-arginine deiminase type-4                              | QLFKLKEFSKAEAFF      | 210,40    |
| Vacuolar protein sorting-associated protein 13A                | ANAFLEFCLKCPEY       | 221,40    |
| Coiled-coil domain-containing protein 127                      | ARLLLKEFEAVLTER      | 222,00    |
| Probable small intestine urate exporter                        | WNETLKEFKAMAPAY      | 224,90    |
| Breast cancer type 1 susceptibility protein                    | NTSELKEFVNPSLPR      | 231,80    |
| Fibrous sheath-interacting protein 2                           | INSLLEKFSDAQIKV      | 238,40    |
| Dystonin                                                       | FYSKLKEFSILLQKA      | 241,10    |
| Ropporin-1B                                                    | LPKMLKEFAKAAIRA      | 261,50    |
| Nucleotide exchange factor SIL1                                | SHQNLKEFALTNPKEK     | 286,90    |
| Sodium channel modifier 1                                      | RQMALKEFSSVYSEE      | 298,70    |
| Poly(A) RNA polymerase, mitochondrial                          | LNTLLKEFQLTEENT      | 318,90    |
| Phosducin-like protein                                         | GKMTLKEFAIMNEDQ      | 330,50    |
| Ropporin-1A                                                    | LPKMLKEFAKAAIRV      | 387,30    |
| Collagen alpha-3(VI) chain                                     | GFPLLKEFVQRVVES      | 390,30    |
| Gem-associated protein 4                                       | PDEVLKEFVLPFLRL      | 392,00    |
| Olfactory receptor 10X1                                        | NQTILKEFILVGFSV      | 455,30    |
| Spectrin alpha chain, erythrocytic 1                           | SEETLKEFSTIYKHF      | 459,00    |
| Protein NYNRIN                                                 | FKRALKEFIFLHGKK      | 459,70    |
| UPF0565 protein C2orf69                                        | YPEVLKEFAQTGIIV      | 463,60    |
| Leucine-rich repeats and immunoglobulin-like domains protein 3 | LPEHLKEFQSLETLD      | 487,70    |
| Epididymal-specific lipocalin-10                               | SFQSLKEFMDACDIL      | 492,40    |
| Required for meiotic nuclear division protein 1 homolog        | MLKPLKEFENTTCST      | 497,00    |

<sup>A</sup> Peptides were included if they had a predicted affinity to HLA-DR4 of below 500 nM and are present in the human but not the mouse proteome.
